# Supplementary material
Source: publisher site journal article supplement (https://www.dovepress.com/article/supplementary_file/556457/556457%20%252509Supplementary%20materials.docx)
Supplement: Supplementary file 1 [file 556457%20%252509Supplementary%20materials.docx]

**Supplementary materials 1**

For aOR > 1 (increased risk),.The E-value for the confidence interval was based on the lower limit of the 95% CI to conservatively assess the weakest plausible causal association. For aOR < 1 (protective effect), inverted to risk direction (1/aOR) before calculation. The E-value for the confidence interval was based on the upper limit of the 95% CI, representing the weakest protective effect that could be nullified by confounding. This methodology is summarized in Table S1

For outcomes with baseline prevalence (P₀) >10% (e.g., dust mite sensitization), we converted aORs to adjusted risk ratios (aRRs) using the formula: , where P₀ was derived from the 2019 pre-pandemic baseline prevalence (Table 2). E-values were then calculated using aRRs.

For rare outcomes (P₀ ≤10%, e.g., cat dander sensitization), E-values were directly calculated from aORs (aOR ≈ aRR). A higher E-value indicates that stronger unmeasured confounding would be required to explain the observed association, thus supporting the robustness of the result. E-values close to 1.0 suggest that even weak confounding could alter the conclusions.

**Table S1** The E-value and the E-value for the confidence interval

|  |  | | **Baseline**  **P₀(2019)** | **aOR** | **95%CI** | **E-value** | **E-value(95%CI)** | |
| --- | --- | --- | --- | --- | --- | --- | --- | --- |
| **d1** | 2020 VS 2019 | | 0.59 | 1.29 | 1.16–1.44 | 1.43 | 1.31 (1.16) | |
| 2021 VS 2019 | | 0.59 | 0.90 | 0.82–1.00 | 1.26 | 1.03 (1.00) | |
| 2022 VS 2019 | | 0.59 | 1.20 | 1.09–1.33 | 1.36 | 1.22 (1.09) | |
| **d2** | 2020 VS 2019 | | 0.54 | 1.42 | 1.29–1.57 | 1.59 | 1.48 (1.29) | |
| 2021 VS 2019 | | 0.54 | 1.08 | 0.98–1.18 | 1.22 | 1.10 (0.98) | |
| 2022 VS 2019 | | 0.54 | 1.44 | 1.32–1.58 | 1.60 | 1.50 (1.32) | |
| **i6** | 2020 VS 2019 | | 0.16 | 0.88 | 0.73–1.06 | 1.48 | 1.28 (1.06) | |
| 2021 VS 2019 | | 0.16 | 0.83 | 0.69–0.99 | 1.64 | 1.10 (0.99) | |
| 2022 VS 2019 | | 0.16 | 0.65 | 0.54–0.78 | 2.26 | 1.77 (0.78) | |
| **e1** | 2020 VS 2019 | | 0.07 | 0.88 | 0.58–1.33 | 1.54 | 2.00 (1.33) | |
| 2021 VS 2019 | | 0.07 | 1.44 | 0.96–2.05 | 2.24 | 1.24 (0.96) | |
| 2022 VS 2019 | | 0.07 | 1.83 | 1.30–2.65 | 3.07 | 1.92 (1.30) | |
|  |  |  |  |  |  |  |  |  |
|  |  | | **Baseline**  **P₀(2019)** | **aOR** | **95%CI** | **E-value** | **Evalue(95%CI)** | |
| **d1** | 2020 vs 2019 | Female | 0.55 | 1.34 | 1.12–1.60 | 1.51 | 1.28 (1.12) | |
| Male | 0.62 | 1.27 | 1.11–1.46 | 1.40 | 1.24 (1.11) | |
| 2021 vs 2019 | Female | 0.55 | 0.82 | 0.70–0.96 | 1.43 | 1.16 (0.96) | |
| Male | 0.62 | 0.96 | 0.85–1.09 | 1.14 | 1.22 (1.09) | |
| 2022 vs 2019 | Female | 0.55 | 1.12 | 0.95–1.31 | 1.28 | 1.18 (0.95) | |
| Male | 0.62 | 1.27 | 1.11–1.44 | 1.40 | 1.24 (1.11) | |
| **d2** | 2020 vs 2019 | Female | 0.50 | 1.44 | 1.23–1.69 | 1.65 | 1.44 (1.23) | |
| Male | 0.56 | 1.42 | 1.26–1.60 | 1.56 | 1.43 (1.26) | |
| 2021 vs 2019 | Female | 0.50 | 0.98 | 0.85–1.13 | 1.11 | 1.32 (1.13) | |
| Male | 0.56 | 1.14 | 1.02–1.27 | 1.30 | 1.10 (1.02) | |
| 2022 vs 2019 | Female | 0.50 | 1.32 | 1.14–1.53 | 1.54 | 1.33 (1.14) | |
| Male | 0.56 | 1.53 | 1.36–1.72 | 1.64 | 1.52 (1.36) | |
| **i6** | 2020 vs 2019 | Female | 0.12 | 0.98 | 0.69–1.41 | 1.15 | 2.02 (1.41) | |
| Male | 0.18 | 0.84 | 0.67–1.05 | 1.58 | 1.25 (1.05) | |
| 2021 vs 2019 | Female | 0.12 | 0.97 | 0.69–1.37 | 1.19 | 1.95 (1.37) | |
| Male | 0.18 | 0.77 | 0.62–0.96 | 1.80 | 1.22 (0.96) | |
| 2022 vs 2019 | Female | 0.12 | 0.77 | 0.55–1.09 | 1.84 | 1.37 (1.09) | |
| Male | 0.18 | 0.61 | 0.49–0.76 | 2.42 | 1.83(0.76) | |
| **e1** | 2020 vs 2019 | Female | 0.06 | 0.91 | 0.45–1.87 | 1.43 | 3.15 (1.87) | |
| Male | 0.07 | 0.86 | 0.52–1.44 | 1.60 | 2.24 (1.44) | |
| 2021 vs 2019 | Female | 0.06 | 1.61 | 0.87–3.16 | 2.60 | 1.56 (0.87) | |
| Male | 0.07 | 1.28 | 0.81–2.07 | 1.88 | 1.77 (0.81) | |
| 2022 vs 2019 | Female | 0.06 | 2.06 | 1.16–3.90 | 3.54 | 1.59 (1.16) | |
| Male | 0.07 | 1.70 | 1.11–2.70 | 2.79 | 1.46 (1.11) | |
|  |  | | **Baseline**  **P₀(2019)** | **aOR** | **95%CI** | **E-value** | **Evalue(95%CI)** | |
| **d1** | 2020 vs 2019 | 0-2y | 0.27 | 0.83 | 0.63–1.09 | 1.56 | 1.33 (1.09) | |
| 2021 vs 2019 | 0.27 | 0.81 | 0.64–1.04 | 1.62 | 1.20 (1.04) | |
| 2022 vs 2019 | 0.27 | 1.01 | 0.78–1.31 | 1.09 | 1.70 (0.78) | |
| **d2** | 2020 vs 2019 | 0.25 | 0.94 | 0.74–1.19 | 1.27 | 1.53 (1.19) | |
| 2021 vs 2019 | 0.25 | 0.94 | 0.76–1.17 | 1.27 | 1.49 (1.17) | |
| 2022 vs 2019 | 0.25 | 1.33 | 1.05–1.69 | 1.76 | 1.23 (1.05) | |
| **i6** | 2020 vs 2019 | 0.04 | 1.77 | 0.78–4.27 | 2.94 | 1.88 (0.78) | |
| 2021 vs 2019 | 0.04 | 1.68 | 0.80–3.83 | 2.75 | 1.81 (0.80) | |
| 2022 vs 2019 | 0.04 | 1.54 | 0.66–3.77 | 2.45 | 2.40 (0.66) | |
| **e1** | 2020 vs 2019 | 0.05 | 0.46 | 0.07–2.08 | 3.77 | 3.58 (2.08) | |
| 2021 vs 2019 | 0.05 | 0.81 | 0.32–2.35 | 1.77 | 4.13 (2.35) | |
| 2022 vs 2019 | 0.05 | 1.30 | 0.46–3.94 | 1.92 | 3.77 (0.46) | |
| **d1** | 2020 vs 2019 | 3-5y | 0.59 | 1.31 | 1.11–1.54 | 1.45 | 1.25 (1.11) | |
| 2021 vs 2019 | 0.59 | 0.86 | 0.74–1.00 | 1.33 | 1.00 (1.00) | |
| 2022 vs 2019 | 0.59 | 1.20 | 1.03–1.40 | 1.35 | 1.12 (1.03) | |
| **d2** | 2020 vs 2019 | 0.54 | 1.50 | 1.30–1.72 | 1.64 | 1.48 (1.30) | |
| 2021 vs 2019 | 0.54 | 1.09 | 0.96–1.24 | 1.24 | 1.16 (0.96) | |
| 2022 vs 2019 | 0.54 | 1.52 | 1.33–1.74 | 1.65 | 1.51 (1.33) | |
| **i6** | 2020 vs 2019 | 0.14 | 0.80 | 0.58–1.11 | 1.72 | 1.41 (1.11) | |
| 2021 vs 2019 | 0.14 | 0.78 | 0.58–1.06 | 1.79 | 1.28 (1.06) | |
| 2022 vs 2019 | 0.14 | 0.62 | 0.45–0.85 | 2.42 | 1.57 (0.85) | |
| **e1** | 2020 vs 2019 | 0.04 | 1.09 | 0.47–2.74 | 1.40 | 3.68 (0.47) | |
| 2021 vs 2019 | 0.04 | 1.31 | 0.61–3.14 | 1.95 | 2.66 (0.61) | |
| 2022 vs 2019 | 0.04 | 1.55 | 0.74–3.66 | 2.47 | 2.04 (0.74) | |
| **d1** | 2020 vs 2019 | 6-17y | 0.73 | 1.51 | 1.27–1.79 | 1.43 | 1.32 (1.27) | |
| 2021 vs 2019 | 0.73 | 1.00 | 0.86–1.17 | 1.00 | 1.26 (0.86) | |
| 2022 vs 2019 | 0.73 | 1.30 | 1.11–1.51 | 1.33 | 1.20 (1.11) | |
| **d2** | 2020 vs 2019 | 0.74 | 1.62 | 1.38–1.91 | 1.47 | 1.37 (1.38) | |
| 2021 vs 2019 | 0.74 | 1.12 | 0.97–1.30 | 1.20 | 1.10 (0.97) | |
| 2022 vs 2019 | 0.74 | 1.43 | 1.23–1.65 | 1.39 | 1.29 (1.23) | |
| **i6** | 2020 vs 2019 | 0.22 | 0.86 | 0.67–1.10 | 1.51 | 1.36 (1.10) | |
| 2021 vs 2019 | 0.22 | 0.79 | 0.63–1.01 | 1.71 | 1.10 (1.01) | |
| 2022 vs 2019 | 0.22 | 0.62 | 0.49–0.79 | 2.32 | 1.71 (0.79) | |
| **e1** | 2020 vs 2019 | 0.08 | 0.88 | 0.54–1.48 | 1.53 | 2.32 (1.48) | |
| 2021 vs 2019 | 0.08 | 1.58 | 1.00–2.57 | 2.54 | 1.00 (1.00) | |
| 2022 vs 2019 | 0.08 | 2.05 | 1.35–3.23 | 3.52 | 2.04 (1.35) | |

**Abbreviations:** d1, *Dermatophagoides* pteronyssinus; d2, *Dermatophagoides* farina; i6, German cockroach; e1, cat dander; f1, egg white; f2, milk; f4, wheat; f24, shrimp.
